# Supplementary material
Source: PubMed Central journal article supplement (PMC3962068)
Supplement: NIHMS560657-supplement-251_2014_759_MOESM1_ESM.pdf [file NIHMS560657-supplement-251_2014_759_MOESM1_ESM.pdf]

## Differential expression and ligand binding indicate alternative functions for zebrafish polymeric immunoglobulin receptor (pIgR) and a family of pIgR-like (PIGRL) proteins

Amanda N. Kortum<sup>a</sup>, Ivan Rodriguez-Nunez<sup>a</sup>, Jibing Yang<sup>a</sup>, Juyoung Shim<sup>b</sup>, Donna Runft<sup>c</sup>, Marci L O'Driscoll<sup>d</sup>, Robert N. Haire<sup>d</sup>, John P. Cannon<sup>d</sup>, Poem M. Turner<sup>a</sup>, Ronda T. Litman<sup>d</sup>, Carol H. Kim<sup>b</sup>, Melody N. Neely<sup>c</sup>, Gary W. Litman<sup>d,e,f</sup>, Jeffrey A. Yoder<sup>a\*</sup>

<sup>a</sup> Department of Molecular Biomedical Sciences and Center for Comparative Medicine and Translational Research, North Carolina State University, 1060 William Moore Drive, Raleigh, NC 27607 USA

<sup>b</sup> Department of Molecular & Biomedical Sciences, University of Maine, Orono, Maine 04469, USA

<sup>c</sup> Department of Immunology and Microbiology, Wayne State School of Medicine, Detroit, MI 48201, USA

<sup>d</sup> Department of Pediatrics, University of South Florida Morsani College of Medicine, 140 7th Avenue South, St. Petersburg, FL 33701 USA

<sup>e</sup> Department of Molecular Genetics, All Children's Hospital Johns Hopkins Medicine, 501 6th Avenue South, St. Petersburg, FL 33701 USA

<sup>f</sup> H. Lee Moffitt Cancer Center and Research Institute, 12902 Magnolia Drive, Tampa, FL 33612 USA

\* Corresponding author at: Jeff\_Yoder@ncsu.edu

---

### Supplemental methods

#### Cloning full-length *pigr* and PIGRL cDNAs

Zebrafish *pigr* and various PIGRL cDNAs were PCR amplified and cloned by 3' or 5' RACE using RNA pooled from kidney and spleen, the GeneRacer kit (Invitrogen), Titanium Taq DNA polymerase (Clontech) and a series of primers (Table S1, below). Initial PIGRL primers were designed to be complementary to predicted Ig domains identified in the reference genome (Zv9). Resultant amplicons were ligated into the pGEM-T Easy plasmid (Promega) and sequenced.

#### Cloning *pigr* transcript.

A partial (5' and 3' truncated) transcript of zebrafish *pigr* was identified in GenBank (accession EF539183). A forward primer, *pigr*FP1, and a nested forward primer, *pigr*FP2, were designed from the D1 domain of this partial *pigr* sequence and used with RACE to identify the 3' sequence of the *pigr* transcript. Similarly, a reverse primer, *pigr*RP1, and a nested reverse primer, *pigr*RP2, were designed from the D2 domain of the partial *pigr* sequence and used with RACE to identify the 5' sequence of the *pigr* transcript. Then, a *pigr*-specific forward primer, *pigr*FP3, and a *pigr*-specific reverse primer, *pigr*RP3, were employed to directly amplify the entire *pigr* open reading frame from zebrafish intestine RNA (40 cycles, annealing at 60 °C).

#### Cloning *pigr*2.1, *pigr*2.3 and *pigr*2.4 cDNAs.

Using 5' RACE, three leader sequences were obtained using degenerate primers, RP1 and the nested primer, RP2. One of these 5' sequences was used to design the forward primer FP1 and the nested primer FP2 which were used with 3' RACE to obtain full-length *pigr*2.1<sup>3842</sup>, *pigr*2.1<sup>3843</sup>, and *pigr*2.1<sup>3844</sup> cDNAs. The proteins encoded by these three transcripts differ by five or fewer amino acids. The forward primer FP3 and the nested primer FP4 were designed from the second 5' RACE sequence and used with 3' RACE to obtain full-length cDNA transcripts for *pigr*2.3<sup>3822</sup>, *pigr*2.3<sup>3823</sup>, *pigr*2.3<sup>3824</sup>, *pigr*2.4<sup>4003</sup>, and *pigr*2.4<sup>4004</sup>. The proteins encoded by the two *pigr*2.4 transcripts differ by two amino acids. The forward primer FP5 and the nested forward primer FP6 were designed from the third 5' RACE sequence and yielded the full length *pigr*2.3<sup>3820</sup> cDNA.

#### Cloning *pigr*3.5, *pigr*3.4 and *pigr*3.10 cDNAs.

5' RACE was performed using the degenerate reverse primer RP3 and the nested reverse primer RP4 and revealed a leader sequence for the *pigr*3 family. Forward primer FP7 and nested primer FP8 were then used with 3' RACE producing the *pigr*3.5<sup>3960</sup>, *pigr*3.5<sup>3961</sup>, *pigr*3.4/7<sup>3962</sup>, *pigr*3.4/7<sup>4001</sup> and *pigr*3.10<sup>4002</sup> cDNAs. Transcripts *pigr*3.10<sup>5187</sup> and *pigr*3.10<sup>5188</sup> subsequently were amplified using FP9 and RP8.

#### Cloning *pigr13.8* and *pigr13.9* cDNAs.

5' RACE with RP3 and RP4 also identified a second 5' sequence from which the forward primer FP9 and the nested forward primer F10 were designed and used with 3' RACE to clone the full-length *pigr13.5*<sup>4021</sup>, *pigr13.8/11*<sup>4020</sup>, *pigr13.8/11*<sup>4023</sup> and *pigr13.9/12*<sup>4027</sup> cDNAs. The proteins encoded by the two variants of *pigr13.8/11* differ by five amino acids.

#### Cloning *pigr12.5* and additional *pigr12.3* cDNAs.

A third set of degenerate reverse primers, RP5 and RP6, when applied to 5' RACE revealed a new leader sequence from which the forward primer FP11 and nested forward primer FP12 were designed. 3' RACE with FP11 and FP12 identified the *pigr12.3*<sup>3968</sup>, *pigr12.3*<sup>3969</sup> and *pigr12.5*<sup>3970</sup> cDNAs.

#### Cloning a *pigr14.2* cDNA.

5' RACE with RP1 and RP2 fortuitously amplified a *pigr14.2* leader sequence, allowing for the design of forward primers FP13 and FP14. Using FP13 and the nested FP14 (that did not incorporate the translational start codon), 3' RACE was performed generating a cDNA encoding a predicted stop codon, from which reverse primer RP7 was designed. Using primers FP15 and RP7, located upstream of the translational start and downstream of the stop codon respectively, a full-length *pigr14.2*<sup>4177</sup> cDNA was obtained.

**Supplemental Table S1. DNA primers for RACE and cloning full-length *pigr* and PIGRL cDNAs<sup>1</sup>**

| PIGRL cDNA                                                 | GenBank Accession    | Forward Primer (FP) Name | Forward Primer Sequence                | Reverse Primer (RP) Name | Reverse Primer Sequence               |
|------------------------------------------------------------|----------------------|--------------------------|----------------------------------------|--------------------------|---------------------------------------|
| <i>pigr</i> <sup>4120</sup><br><i>pigr</i> <sup>4121</sup> | KF932324<br>KF932325 | pigrFP1                  | TGTGAACATGCGCAACCTGAC                  | pigrRP1                  | GTTCTTATCATCATGGATGTGG                |
|                                                            |                      | pigrFP2                  | ACTGGTGCGGTGTGGAGCTTG                  | pigrRP2                  | CAGGCAGGAGTTCAGTTTCC                  |
|                                                            |                      | pigrFP3                  | GACCTCAACA <u>ATG</u> AGTCTTCCGCTGCTTC | pigrRP3                  | CGTTGTTTTCAGTCCCTG <u>TTA</u> GAGCATC |
| <i>pigr2.1</i> <sup>3842</sup>                             | KF932326             | FP1                      | ATGCAATTGCTGCAC <u>ATGC</u>            | RP1                      | AAWACCAKCCAGAATCAGA                   |
|                                                            |                      | FP2                      | <u>CATGCGGACGCAAAAATGT</u>             | RP2                      | ATCNMTRATCTGCACTGAT                   |
| <i>pigr2.1</i> <sup>3843</sup>                             | KF932327             | FP1                      | ATGCAATTGCTGCAC <u>ATGC</u>            | RP1                      | AAWACCAKCCAGAATCAGA                   |
|                                                            |                      | FP2                      | <u>CATGCGGACGCAAAAATGT</u>             | RP2                      | ATCNMTRATCTGCACTGAT                   |
| <i>pigr2.1</i> <sup>3844</sup>                             | KF932328             | FP1                      | ATGCAATTGCTGCAC <u>ATGC</u>            | RP1                      | AAWACCAKCCAGAATCAGA                   |
|                                                            |                      | FP2                      | <u>CATGCGGACGCAAAAATGT</u>             | RP2                      | ATCNMTRATCTGCACTGAT                   |
| <i>pigr2.3</i> <sup>3820</sup>                             | KF932329             | FP5                      | AACCACTCAGAAGCTGACAGA                  | RP1                      | AAWACCAKCCAGAATCAGA                   |
|                                                            |                      | FP6                      | GCTGACAGAGAAACAGA <u>ATGG</u>          | RP2                      | ATCNMTRATCTGCACTGAT                   |
| <i>pigr2.3</i> <sup>3822</sup>                             | KF932330             | FP3                      | TGCTGACAGAGAAACAGA <u>ATGG</u>         | RP1                      | AAWACCAKCCAGAATCAGA                   |
|                                                            |                      | FP4                      | GAGAAACAGA <u>ATGG</u> CAGCGTA         | RP2                      | ATCNMTRATCTGCACTGAT                   |
| <i>pigr2.3</i> <sup>3823</sup>                             | KF932331             | FP3                      | TGCTGACAGAGAAACAGA <u>ATGG</u>         | RP1                      | AAWACCAKCCAGAATCAGA                   |
|                                                            |                      | FP4                      | GAGAAACAGA <u>ATGG</u> CAGCGTA         | RP2                      | ATCNMTRATCTGCACTGAT                   |
| <i>pigr2.3</i> <sup>3824</sup>                             | KF932332             | FP3                      | TGCTGACAGAGAAACAGA <u>ATGG</u>         | RP1                      | AAWACCAKCCAGAATCAGA                   |
|                                                            |                      | FP4                      | GAGAAACAGA <u>ATGG</u> CAGCGTA         | RP2                      | ATCNMTRATCTGCACTGAT                   |
| <i>pigr2.3</i> <sup>3968</sup>                             | KF932333             | FP11                     | CCCAATTAACCACTCAGACAC                  | RP5                      | TCCAGGTTCCATAGYMACAGT                 |
|                                                            |                      | FP12                     | GACAGAGAAACAGA <u>ATG</u> CAGC         | RP6                      | AAGAACTCTGATCTGGATGATC                |
| <i>pigr2.3</i> <sup>3969</sup>                             | KF932334             | FP11                     | CCCAATTAACCACTCAGACAC                  | RP5                      | TCCAGGTTCCATAGYMACAGT                 |
|                                                            |                      | FP12                     | GACAGAGAAACAGA <u>ATG</u> CAGC         | RP6                      | AAGAACTCTGATCTGGATGATC                |
| <i>pigr2.4</i> <sup>4003</sup>                             | KF932335             | FP3                      | TGCTGACAGAGAAACAGA <u>ATGG</u>         | RP1                      | AAWACCAKCCAGAATCAGA                   |
|                                                            |                      | FP4                      | GAGAAACAGA <u>ATGG</u> CAGCGTA         | RP2                      | ATCNMTRATCTGCACTGAT                   |
| <i>pigr2.4</i> <sup>4004</sup>                             | KF932336             | FP3                      | TGCTGACAGAGAAACAGA <u>ATGG</u>         | RP1                      | AAWACCAKCCAGAATCAGA                   |
|                                                            |                      | FP4                      | GAGAAACAGA <u>ATGG</u> CAGCGTA         | RP2                      | ATCNMTRATCTGCACTGAT                   |
| <i>pigr2.5</i> <sup>3970</sup>                             | KF932337             | FP11                     | CCCAATTAACCACTCAGACAC                  | RP5                      | TCCAGGTTCCATAGYMACAGT                 |
|                                                            |                      | FP12                     | GACAGAGAAACAGA <u>ATG</u> CAGC         | RP6                      | AAGAACTCTGATCTGGATGATC                |
| <i>pigr3.4</i> <sup>3962</sup>                             | KF932338             | FP7                      | ACACACTTACTCCACTGCAG                   | RP3                      | GATCTCYACAGCGCACCAGTAA                |
|                                                            |                      | FP8                      | GCAGAC <u>ATG</u> ATTCACACTCTG         | RP4                      | TCTSCCATTCTGACTGATAA                  |
| <i>pigr3.4</i> <sup>4001</sup>                             | KF932339             | FP7                      | ACACACTTACTCCACTGCAG                   | RP3                      | GATCTCYACAGCGCACCAGTAA                |
|                                                            |                      | FP8                      | GCAGAC <u>ATG</u> ATTCACACTCTG         | RP4                      | TCTSCCATTCTGACTGATAA                  |
| <i>pigr3.5</i> <sup>3960</sup>                             | KF932340             | FP7                      | ACACACTTACTCCACTGCAG                   | RP3                      | GATCTCYACAGCGCACCAGTAA                |
|                                                            |                      | FP8                      | GCAGAC <u>ATG</u> ATTCACACTCTG         | RP4                      | TCTSCCATTCTGACTGATAA                  |
| <i>pigr3.5</i> <sup>3961</sup>                             | KF932341             | FP7                      | ACACACTTACTCCACTGCAG                   | RP3                      | GATCTCYACAGCGCACCAGTAA                |
|                                                            |                      | FP8                      | GCAGAC <u>ATG</u> ATTCACACTCTG         | RP4                      | TCTSCCATTCTGACTGATAA                  |
| <i>pigr3.5</i> <sup>4021</sup>                             | KF932342             | FP9                      | TCCACTGCAGAC <u>ATG</u> ATTCAC         | RP3                      | GATCTCYACAGCGCACCAGTAA                |
|                                                            |                      | FP10                     | GCAGAC <u>ATG</u> ATTCACACTCTG         | RP4                      | TCTSCCATTCTGACTGATAA                  |
| <i>pigr3.8</i> <sup>4020</sup>                             | KF932343             | FP9                      | TCCACTGCAGAC <u>ATG</u> ATTCAC         | RP3                      | GATCTCYACAGCGCACCAGTAA                |
|                                                            |                      | FP10                     | GCAGAC <u>ATG</u> ATTCACACTCTG         | RP4                      | TCTSCCATTCTGACTGATAA                  |
| <i>pigr3.8</i> <sup>4023</sup>                             | KF932344             | FP9                      | TCCACTGCAGAC <u>ATG</u> ATTCAC         | RP3                      | GATCTCYACAGCGCACCAGTAA                |
|                                                            |                      | FP10                     | GCAGAC <u>ATG</u> ATTCACACTCTG         | RP4                      | TCTSCCATTCTGACTGATAA                  |
| <i>pigr3.9</i> <sup>4027</sup>                             | KF932345             | FP9                      | TCCACTGCAGAC <u>ATG</u> ATTCAC         | RP3                      | GATCTCYACAGCGCACCAGTAA                |
|                                                            |                      | FP10                     | GCAGAC <u>ATG</u> ATTCACACTCTG         | RP4                      | TCTSCCATTCTGACTGATAA                  |
| <i>pigr3.10</i> <sup>4002</sup>                            | KF932346             | FP7                      | ACACACTTACTCCACTGCAG                   | RP3                      | GATCTCYACAGCGCACCAGTAA                |
|                                                            |                      | FP8                      | GCAGAC <u>ATG</u> ATTCACACTCTG         | RP4                      | TCTSCCATTCTGACTGATAA                  |
| <i>pigr3.10</i> <sup>5187</sup>                            | KF932347             | FP9                      | TCCACTGCAGAC <u>ATG</u> ATTCAC         | RP8                      | CACATCTAGGTCTCTGACAG                  |
| <i>pigr3.10</i> <sup>5188</sup>                            | KF932348             | FP9                      | TCCACTGCAGAC <u>ATG</u> ATTCAC         | RP8                      | CACATCTAGGTCTCTGACAG                  |
| <i>pigr4.2</i> <sup>4177</sup>                             | KF932349             | FP15                     | CCGTCTGACCATCATTTACAG                  | RP7                      | CCCTTCTATATCAAAGGTCGTC                |
|                                                            |                      | FP13                     | GGAACTCTGAGCATGAAGACT                  | RP1                      | AAWACCAKCCAGAATCAGA                   |
|                                                            |                      | FP14                     | GACTTTAGATCGTGTRMCTGT                  | RP2                      | ATCNMTRATCTGCACTGAT                   |

<sup>1</sup> Sequences corresponding to translational start and stop codons are underlined

**Supplemental Table S2. DNA primers for RT-PCR**

| Gene(s)        | Primer sets | Forward primer<br>Reverse primer | Annealing temp (°C) | Extension time (s) | No. of cycles | Amplicon length (bp) |
|----------------|-------------|----------------------------------|---------------------|--------------------|---------------|----------------------|
| <i>pIgR</i>    | pIgR_intl-F | CAGCACAGTGACTACAATCG             | 61                  | 30                 | 35            | 430                  |
|                | pIgR-D2_R   | CTCACTCCACCTGAGGTTTTT            |                     |                    |               |                      |
| PIGRL1 Family  | PIGRL1-F    | CAGRRTAYAAGAAATACTGGTGCC         | 59.5                | 30                 | 35            | 410                  |
|                | PIGRL1-R    | GARCTGTAGAAACACTGRACACT          |                     |                    |               |                      |
| PIGRL2 Family  | PIGRL2-F    | ACTGTTAAGCCTGGAGGATCTGT          | 66                  | 30                 | 35            | 356                  |
|                | PIGRL2-R    | GARCTGTAGAAACACTGRACACT          |                     |                    |               |                      |
| PIGRL3 Family  | PIGRL3-F    | ATATTACTGGTGCGCTGTGGA            | 66                  | 30                 | 35            | 159                  |
|                | PIGRL3-R    | GARCTGTAGAAACACTGRACACT          |                     |                    |               |                      |
| PIGRL4 Family  | PIGRL4-F    | TGGACAATAACTGATTATCCA            | 61                  | 30                 | 35            | 227                  |
|                | PIGRL4-R    | GARCTGTAGAAACACTGRACACT          |                     |                    |               |                      |
| <i>β-actin</i> | B-actin fwd | GGTATGGAATCTTGCGGTATCCAC         | 65                  | 30                 | 30            | 301                  |
|                | B-actin rev | ATGGGCCAGACTCATCGTACTCCT         |                     |                    |               |                      |
| <i>mpx</i>     | MPX fwd     | CCAGAACCAGTGAGCCTGAGACACG        | 70                  | 30                 | 35            | 639                  |
|                | MPX rev     | CAGTCTAACCATGGGCAGCGCTGCAC       |                     |                    |               |                      |
| <i>tcra</i>    | TCRα fwd    | TCGTTTTCAATGTGCTGGTG             | 68                  | 30                 | 35            | 339                  |
|                | TCRα rev    | GATGATCTGGAATGGGATGC             |                     |                    |               |                      |

**Supplemental Table S3. Human proteins most similar to zebrafish PIGRL proteins<sup>1</sup>**

| Query    | Description                                | Alias   | Max score | Total score | Query cover | E value | Ident | GenBank Accession |
|----------|--------------------------------------------|---------|-----------|-------------|-------------|---------|-------|-------------------|
| Pigrl2.4 | polymeric immunoglobulin receptor          | pIgR    | 64.7      | 226         | 54%         | 8e-11   | 23%   | NP_002635.2       |
|          | CMRF35-like molecule 6 precursor           | CD300C  | 50.8      | 94.7        | 53%         | 6e-07   | 29%   | NP_006669.1       |
|          | trem-like transcript 2 protein             | TREML2  | 50.8      | 50.8        | 20%         | 1e-06   | 39%   | NP_079083.2       |
| Pigrl3.5 | polymeric immunoglobulin receptor          | pIgR    | 60.8      | 229         | 58%         | 2e-09   | 27%   | NP_002635.2       |
|          | CMRF35-like molecule 1                     | CD300LF | 55.1      | 106         | 57%         | 5e-08   | 28%   | NP_620587.2       |
|          | CMRF35-like molecule 7                     | CD300LB | 52.4      | 102         | 72%         | 2e-07   | 29%   | NP_777552.3       |
| Pigrl4.2 | polymeric immunoglobulin receptor          | pIgR    | 70.1      | 232         | 87%         | 3e-13   | 24%   | NP_002635.2       |
|          | natural cytotoxicity triggering receptor 2 | NKp44   | 59.7      | 99.4        | 68%         | 4e-10   | 35%   | NP_001186439.1    |
|          | CMRF35-like molecule 2                     | CD300E  | 55.1      | 102         | 65%         | 8e-09   | 33%   | NP_852114.2       |

<sup>1</sup> Results are from BLASTp searches of the human reference protein database. Predicted sequences are excluded from results. Top three hits per query are shown.



>pIgr-D1  
GSHSTVTTIGDVAVLEGGSVTVPCHYNPQYISNVKYWCGRMREFCSSLARTDDPESAPNGNRKVTIADDPQHVFTVNMRNLTEDD  
SGWYWCGVELGGMWVSDSTASLYISVVQ

>Pigr11.1-D1  
SEYKTASASRALTVQGTGGSVIPCYDRYYTEYKKYWCFNAKGYFNCSILAYTNETKGKVS LTDHPDQSFFFTV TMRNLQHEDTGAY  
WCAVEIEGFFKLDKREQLHLTVQS

>Pigr11.3-D1  
CKIGSASRALIIQTGGSVVIPCYDRKYTGKYYWCFNTNAAFNYCSILAYTKETKEKVSVIDHPDQSFFFTVAMRNLQEEDTGYGYWC  
AVEIGKLELDKNKQLYLSVQS

>Pigr11.4-D1  
CKIGSASRALTIQTGGSVVIPCYDRKYTGKYYWCFDAKTAFFNYCSILAYTNETKGKVSVIDHPDQSFFFTV TMRNLQHEDTGYGYWC  
AVEIEGFFKLDKEQLHLTVQS

>Pigr11.5-D1  
SVKSVLTVQGTGGSVVVPCYYDMKYAEYKKYWCFHANDLYSSCSILAYANETKGKVSVIDHPDQSFFFTV TMRNLQHGYTGYGYCAVEI  
GGIFELDQKKQLYLSVQS

>Pigr11.6-D1  
PECKTASAYSILTAHTGGSVVIQCFYDKYYAENKKYWCFYPTDSYSYCSILAYTNEYREKVSVDYPYLSYFTV TMRNLQYKDSGY  
WCAVETGGIFVNDALQYQLRIQS

>Pigr11.7-D1  
CKTAYVDPVLTVQGTGGSVVIPCFYDKRYAEYKKYWCFYKTD SYWFC SALAYTNETKGKASVIDHPDQSFFFTV TMRNLQHEDTGYGYWC  
AVEIGTILIRDET KKLQLRVQT

>Pigr11.8-D1  
PECKTAYVDPVLTVQGTGGSVVIPCFYDKGYAEYKKYWCFYKTD SYRSCSILAYANETKGKVSVIDHPDQSFFFTV TMRNLQHEDTGY  
WCAVEIGGIFKRDEKKLHLIVQT

>Pigr12.1-D1  
VESFEGGSNHTITVKPGGSVTIPCYDEKNPPQKKYWYSVIGESRKYTNTTEENLSVIDHPDQSLFTV TMRNLQENKHNGKYYCTVE  
TGQKSNVTYELFLQ

>Pigr12.2-D1  
VESYSGLDHVL T INPGGSVTIPCHYNEETQWQMKFWFSEIFQLRSY TNTTEENLSVIDRDPDQSLYTV TMRNIESRQSGFYCVLESE  
GKENTTYELFLM

>Pigr12.3-D1  
AESYDAFSSNRLTVKPGGSVTIPCYDEKNTQLKYWFSVNDECNTY TNTTEENLSVIDHPDQSLVTV TMRNLQEKHTGEYHCGVVPG  
GVIIKIYLQVQD

>Pigr12.4-D1  
YNEFSNQALTVQPGGSVTIPCHYNKQYTQLKKHCYLETDKY TNTREKNLLVIDHPDQSLFTV TMRNLRENQTGLCYCVVETGGTGT  
IYQFYLK

>Pigr12.5-D1  
AESLSCWSRCTITVQHGGSVTIPCYDKKNPPQKKYWYTEIEEYHKSTNTTEKNLSVIDHPDQSLFTV TMRNLQDKQSGRHFCAL  
GGQETVIYEFYLVQVQF

>Pigr12.6-D1  
VESFSGGSNRTITVKPGGSVTIPCYDEKNPPRRKYWFSEHGQSNKY TNTTEENLSVIDHPDQSLFTV TMRNLQENKHNGQYYCTVE  
TGQKPNVTYVYELYLKVHS

>Pigr12.7-D1  
VESYTGGSNHIITVQHGGSVTIPCHYDEKYTLQNKYWF AEIDKTNKYTNTTEENLSVIDHPDQSLFTVTMRNLQYKHTGHYYCVVET  
GEHPPIKVIYEPYIKIKY

>Pigr13.1-D1  
GSWPYNLNIRVKS GSPGIIPCQYEVKNKANRKYWCQGSVWSSCSVLAYANETRNFKSITDYPAQSVFTVEWQNLQPSDSGCYWC AVE  
ISGTGTLDSGYVYLVTVQS

>Pigr13.2-D1  
EAWYDVNIGVKS GSPGIIPCQYKEK LKANRKYWCQGSVWSSCTILAYANETRNFKSITDYPEQSVFTVEWQTLQPSDSGCYWC AVE  
INGYGTVD DGYHMYLTVQS

>Pigr13.3-D1  
GAWIDKLNIGVKS GSPGIIPCQYEQYQENHKYWCQGMFWSSCTILAFGNGPKSKFSITYYPAQSIFTVEWQKLQPSDSGYWCAVE  
IGGSGTLDAGYVYLVTVQS

>Pigr13.4-D1  
GAWVINQNIRVKS GSPGIIPCQYEEQYKEHQKFWCQGYFWSTCNLLAFGNETGKNFSITDYPAQSVFTVEWQNLQPSDSGHYWC AVE  
IGGPGTLDAGYVYLVTVQS

>Pigr13.5-D1  
GAWIDKLNIGVKS GSPGIIPCQYKEQYKENHKYWCQGMFWSSCTILAFGNGPRSKFSITYYPAQSIFTVEWQNLQPSDSGYWCAVE  
IGDSGIPDARYYLKLVQP

>Pigr13.6P-D1  
GAWIDKLNIRVKS GSPGIIPCQYDEQYKENHKYWCRCGSVWSSCVIMAYANETSNTFSITDNPAQSIFTVEWQNLQPSDSGFYWC AVE  
IGGSETLDAGYMYLVTVQS

>Pigr13.7-D1  
DGVWINKLNIGVKS GSPGIIPCQYDEQYKEHQKFWCWGTFWFSTCSILAYVNETRNFKSITDYPAQSIFTVEWQNLQLSDSSYYWC VV  
EIGGPGTLDAGYLYLVTVQS

>Pigr13.8-D1  
GAWVINPNIRVKS GSPGIIPCQYKEQYKEHQKFWCWGTFWFSTCSILAYVNGTRNFKSITDYPAQSIFTVEWQNLQPSDSAYYWC AVE  
IGGPGTLDAGYFLYLVTVQS

>Pigr13.9-D1  
GVWINKLNIGVKS GSPGIIPCQYEEQYKEHQKYWCRGYIWSSCSILAYVNETRNFKSITDYPAQSIFTVEWQNLQESNSSYYWC AVE  
IGGPGTLDAGYLYLVTVQS

>Pigr13.10-D1  
DGAWIDKLNIGVKS GSPGIIPCQYVEQYQENLKYWCQGMFWSSCTILAFGNGPRSKFSITDYPAQSIFTVEWQNLQPSDSGYWCAV  
EIGDSEKPDASYLYLVTVQS

>Pigr13.11-D1  
GAWIIRVKS GSPGNIPCLYEEQYKEHQKFWCQGYFWSTCAILLTFVNETRNFKSITDYPAQSIFTVEWQNLQPSDSGYWCAVEIGGA  
ETLDAGYVHLTVRS

>Pigr13.12-D1  
GVWINKLNIGVKS GSPGIIPCQYEEQYKEHQKYWCRGYIWSSCSILTFVNETRNFKSITDYPAQSIFTVEWENLQESNSSYYWC AVE  
IGGPGTLDAGYVYLVTVQS

>Pigr14.1-D1  
TLSMKTLDRVTVSNGGSITIPCLYENKYKLD SKNWCKGKAWLTCKTIAHANHTGIWTITDHPADNIFTVTLNKAKPSNSGYWCAAE  
SDRTSLYLVTVQEGKEGLFV

>Pigr14.2-D1  
TLSMKTLDRVPVIEGKTITIPCLYDNKYKLNKKYWCNGNTWLGC SVVAYANHHKGTITDYPDHNIFTVTLNNTSSDSGHYWC AVE  
IDNHVDNSKYLYLVTVQK



>Pigr14.3-D1  
 TLSMKTLDRVTVSNGGTITIPCLYENKYKLD SKNWCKGKAWLTCKTIAHANHTGIWTITDHPADNIFTVTLNKAKPSNSGYYWCAA  
 ESDRTSLYLTVQEGKEGLFV

>Pigr14.4-D1  
 TLSMKTLDRVPVIEGETITIPCLYDNKYKLNKKYWCNGNTWLGCSVVAYANHKGKWTITDYPDHNIFTVTLNNSSTSSDSGYYWCAVE  
 IDNHVDNSKYLYLTVQK

>pIgr-D2  
 GMSVVNGMVSAAEEGKSVSVQCLY SKNLRWSEKRWCRSGNWNSSCLLTDSEGTFSGKNVHIHDDKNSVFTVTLQRLEMRDSGWYWCGAG  
 QQNVAVHVSVTRR

>Pigr11.1-D2  
 PEVSVMNSSVSGHESGDVSVQCFYSSSEYRNTEKRWCRYKDQICYAVERFNTSHNASVQIRDDGESSFTVLM TGLRLSDSGWYSCCVG  
 GKEALVQLTVTE

>Pigr11.3-D2  
 PDVSVKSSRVSGHEGDHVRIQCFYSSGYRNTQLLSLYLHHIFCFTEKTTNTSQNSSVQISDDGESSFTVLM TGLRLSDSGWFSCCVG  
 KQETLVQLTVTE

>Pigr11.4-D2  
 PDVSVKSSSES GHEGDDVSVQCFYSSGYKKLKRWCYKDRKCFREKKTDTSQSSSVQISDDGESSFTVLMITGLRLSDSGWYFCSAG  
 NLQAPVQLTVTE

>Pigr11.5-D2  
 SDVSVSSSVSGHEGDDVSVQCFYSSRYKNKLRWCYKDKCFREKKTDTSQNSSVQISDDGESSFTVLM TGLRLSDSGWYFCSAG  
 EQIILVQLTVTK

>Pigr11.7-D2  
 PVVSVMSSSVSKHEGDNVTFQCLY SFGYRNSQKQWCYKDKCFYPEEKTDTSQSSSVQISDDGERCFTVLM TGLRLSDSGWYFCSA  
 GDRIIPVQLTVT

>Pigr11.8-D2  
 PDVSVMSSSVSKHEGDNVTFQCLY SSGYRNSQKQWCYKDKCFNPEEKTDTSQNSSVQISDDGERCFTVLM TGLRLSDSGWYYCSA  
 GDRIIPVQLTVT

>Pigr12.1-D2  
 PDVSVMNSSVSGHEGDDVSVQCFYSSGYKDKQKRWCRYKDKCFSQKKTDTSQSSSVQISDDGESSFTVLM TGLRLSDSGWFFCSVG  
 HQTIPVKLTVTEDKIFS

>Pigr12.2-D2  
 PDVSVLSSSVSGHESGNVSIQCFYSSKYRDTQKQWCYKDKCFRENKTNISQSSSVQISDDGENSFTVLM TGLRLSDSGWYFCSAG  
 NRIVPVQLTVTEAEP

>Pigr12.3-D2  
 PDVSVKSSSVSGHEGGNVSVQCFYSSGYRDKQKRWCRFKDEKCFREKKTNTSKNSSVQISDDGESSFTVLM TGLRLSDSGWYYCSAG  
 EQILPLQLTVTTSES

>Pigr12.4-D2  
 PDVSVMSSSVSGHEGDTVSVQCFYSSGYKNEQKQWCYKNQKCFGEKKTDTSKSSSVQISDDGKSSFTVLM TGLRLSDSGWYFCSVG  
 NQMIPVQLTVTHTES

>Pigr12.5-D2  
 PDVSVFSSVSGHEGGNVSVQCFYSSGYRTLQKQWCYKDKCFTEKKTDTSQNPSVQISDNGERCFTVLM TGLRLSDSGWYFCSAGD  
 RIIPVQLTVTTLES

>Pigr12.6-D2  
 PDVSVMSSSVSGHEGGNVSVQCFYSSSEYKKLKRWCYKDEKCFRKKTNTSQNSSVQISDDGENFFT VLM TGLRLSDSGWYYCSAGD  
 QIVPVQLTVTDALSCTVFFSNRLF

>Pigr12.7-D2  
PDVSVMSSSVSGHEGDTVSVQCFYSSSEYEKLLKRWCRYEDQKCFREKKTDTSQNSSVQISDDGESSFTVLMTGLT.LSDSGWYFCSAG  
EQIIPVQLTVTGAETST

>Pigr13.1-D2  
PAVSVMSSSVSAHEGDGVRVQCFYTSQYQNDFKHWCRYKDQRCFTKKKTDTSQNSSVQISDDGKSSFTVLMTGLT.LSDSGWYFCSVG  
DLQVHVHLIVTKPGPK

>Pigr13.2-D2  
YGVFVKSSSVSGHEGGDVSQCIYSDIYRNTIKQWCRVKDKRCYAVERSDTSQNPSVQISDDGESSFTVLMTRLRLSDSGWYFCSVE  
DLQVLVQLTVTKPGPK

>Pigr13.3-D2  
PDVSVRSSSVSGHEGDDVRVQCFYSSGYKAKNKQWCRVKDKSCFTEKKTDTSQNSSVQISDDGESSFTVLMTGLRLSDSGWYFCSVG  
NLQVPVQLTVTKPRPK

>Pigr13.4-D2  
PDVSVMSSSVSGHEGGNVSVQCFYSSRYKAYNKQWCRVKDKSCYAVERSDTSQSSSVQISDDGESSFTVLMTGLRLSDSGWYFGSVG  
NLQVPVQLTVTKPEHK

>Pigr13.5-D2  
PDVSVKSSSVSGHEGGNVSVQCFYSSSEYHNKLGWCRFKDKRCFKEEKTDTSQNPSVQISDDGESSFTVLMTGLT.LSDSGWYFCSAG  
NLQVPVRLTVTKPEPK

>Pigr13.7-D2  
PDLVSVMSVSGHEGGNVSVQCFYSSGYKNKTKQWCRVKDKSCFPENKTDTFQNSSVQISDDGESCFVLMTGLT.LSDSGWYFCSAG  
NLQVPVQLTVTKPEPK

>Pigr13.8-D2  
PDVSVKSSSVSGHEGGNVSVQCLYRSGYKTYNKQWCRVKDKSCFTEEKTDTSQNLVSVQISDDGKSFFTVLMTGLNLSDSGWYFCSVG  
DLQVPVQLTVTKPEPK

>Pigr13.9-D2  
PALSVLNSSVSGHEGGNVSVQCFYSSGYKAKTKQWCRFKDKSCFTEKKTDTFQNPVSVQISDDGKSSFTVLMTGLRLSDSGWYFCSVG  
DLQVPVQLTVTKPVPK

>Pigr13.10-D2  
PDVSVKSSSVSGHEGGNVSVQCFYSSGYKAKEKQWCKYKDQKCLYPKNTGTSQNSSVQISDDGKSSFTVLMAGLRLSDSGWYFCSV  
GDLQVPVRLTVTKPEPK

>Pigr13.10-D2\*  
PDLVSVMSVSGHVGGNVSVQCFYSSGYKNKTKQWCRVKDKSCFPENKTDTFQNSSVQISDDVSSFTVLMTGLRLSDSGWYFCSVG  
DLQVPVQLTVTKPKPK

>Pigr13.11-D2  
PDVSVMSVSGHEGGNVSVQCFYSSGYKAYNKQWCRVKDKSCFTEEKMDTSQNLVSVQISDDGKSFFTVLMTGLNLSDSGWYFCSVG  
NLKVPVQLTVTKPEPK

>Pigr13.12-D2  
PAVSVMSVSGHEGDDVSQCFYSSGYKAKTKQWCRFKDKSCFTEKKTDTSQNSSVQISDDVSSFTVLMTGLT.LSDSGWYFCSVG  
DLQVPVQLTVTKPEHK

>Pigr14.1-D2  
PDVSVVNSSVGLGHEGDDVRVQCFYSSAYQNELKRWCRMKDQKCFTEKKSASQNSSVQISDDGESFVLMTGLRLSDSGWYFCSAGD  
LQVPVRLTVTKNKA

>Pigr14.2-D2  
PDVSVLSSSVSGHGDDVSVRCFYRSAYKNKLGWCRIDDLTCFREKKTDTSQNSSVQISDDGESSFTVLMTGLRLSDSGWYFCSVG  
NLQVPVQLTVHQGENKNKNTCKSFQLLSENICKIYLKL

>Pigr14.3-D2

PDVSVVNSSVLGHEGDDVQCFYSSAYQNELKRWCRMKDQKCFTEEKTNTSQSSSVQISDDGESFVLMTGLRLSDSGWYFCSVGDLO  
VPVRLTVTKNKAGTSLTIILNVLLPFASSVSMKMKSPDTIVYEQDSQM

>Pigr14.4-D2

PDMSVLSSSVSGHKGDDVSVRCFYRSANQNKLKQWCRIDDLTCFREKKTDTSQNSSVQIIDDGESSFTVLMTGLRLSDSGWYYCSAG  
NLQVPVQLTVHKGENKNKNTCKSFMQLPDNIKCIYLKLVSYLYKTIHINIV

>orphan-D2

PDVSMSSSVSGHEGGLSAQCFYSSGYKAKNKQWCGYKDKKCFTEKKTDTSQNSSVQISDDGKSSFTVLMTGLRLSDSGWYFCSVG  
NLQFPVQLTVSKPERKGIITNQSAVNNVKKLLHLKYPCCSFLYFPVLTTPETE

**Figure S2. Zebrafish plgR and PIGRL Ig domains (D1 and D2).** Ig domains encoded by Zv9 genomic scaffolds 234, 235 and 33509 are shown. \* indicates a second D2 domain encoded by *pigr13.10*. The orphan-D2 domain was identified in scaffold 3509.

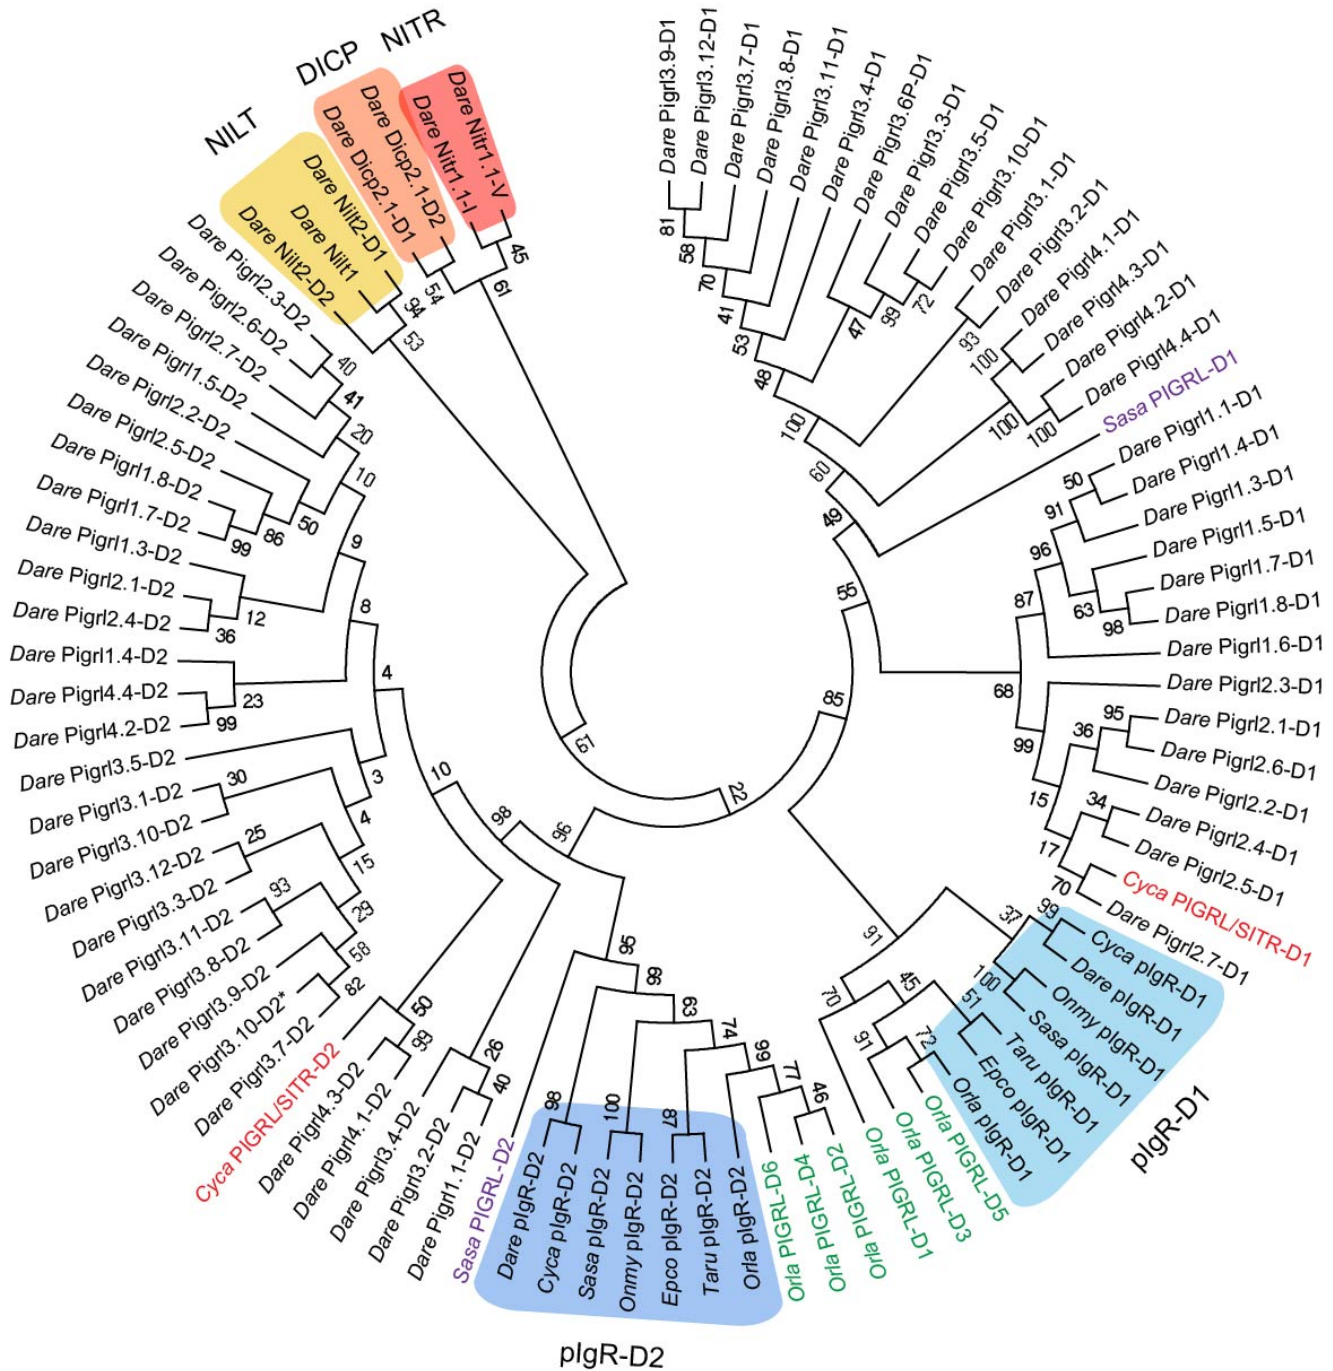

**Figure S3. Phylogenetic comparison of plgR and PIGRL Ig domains to representative NILTs, NITRs and DICPs.** plgR (blue shading) and PIGRL Ig domains from multiple fish species (see Figure S2 and methods) were aligned with Ig domains from zebrafish Nilt1 and Nilt2 (yellow shading, GenBank CAR82065, CAR82066), Nitr1i (red shading, GenBank NP\_571721) and Dicip2.1 (orange shading, GenBank NP\_001245155). Single PIGRL sequences previously reported from carp (red text, GenBank ADL59933) and salmon (violet text, GenBank ADM18014) as well as predicted plgR (GenBank XM\_004079122) and PIGRL sequences (green text, GenBank XM\_004079121) from medaka were included. Species include: zebrafish (*Danio rerio*, *Dare*), carp (*Cyprinus carpio*, *Cyca*), fugu (*Takifugu rubripes*, *Taru*), orange-spotted grouper (*Epinephelus coioides*, *Epco*), Atlantic salmon (*Salmo salar*, *Sasa*), rainbow trout (*Oncorhynchus mykiss*, *Onmy*) and medaka (*Oryzias latipes*, *Orla*). \* indicates a second D2 domain present in *pigr3.10*. The NITR D1 and D2 domains are variable (V) and intermediate (I) Ig domains, respectively.

**a** *Homo sapiens* chr 1

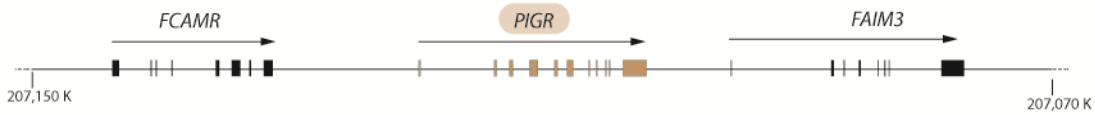

**b** *Homo sapiens* chr 14

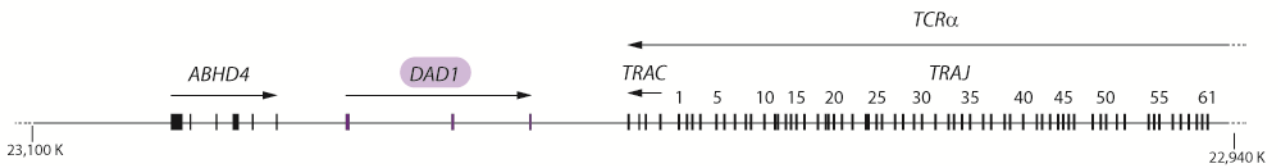

**c**

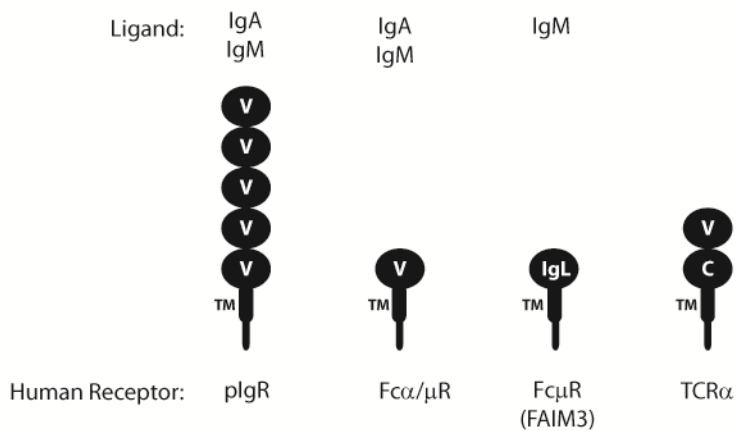

**Figure S4. Genomic organization of the human *PIGR* and *DAD1* loci.** (a-b) The regions of human chromosomes 1 and 14 that encode *PIGR* and *DAD1* are shown. (c) The protein structures and ligands of human pIgR, Fc $\alpha$ / $\mu$ R, Fc $\mu$ R and TCR $\alpha$  are illustrated for comparison. Receptor domains include Ig-like (IgL), variable-type (V), and constant (C) as defined by UniProt (<http://www.uniprot.org/>).

>pIgr encoded by cDNA 4120, transcript variant 1 (GenBank KF932324)  
MSLPLLLLTALVLGGLPGCHS|TVTTIGDVAVLEGGSVTPCHYNPQYISNVKYWCSEGRMREFCSSLARTDDPESAPNGNRKVTIADDP  
TQHVFTVNMNRNLTEDDSGWYWCVELGGMWVSDSTASLYISVVQGMVVMNGMVSAEKGKSVSVQCLYSKNLRWSEKRWCRSGNWNNSC  
LLTDSEGTFSGKNVHIHDDKNSVFTVTLQRLERDSDGWYWCAGQQNVAHVSVTRRSPTPVSTAFPVHNKTAGNLSVTSNESYSR  
P|VWESPLVMCGVLLVMTACVALW|KLQQQCKKKHKPRETSDMSDNLAICPWREGDCKNASVIFLNTPAQQVQML

>pIgr encoded by cDNA 4121, transcript variant 2 (GenBank KF932325)  
MSLPLLLLTALVLGGLPGSHS|TVTTIGDVAVLEGGSVTPCHYNPQYISNVKYWCSEGRMREFCSSLARTDDPESAPNGNRKVTIADDP  
TQHVFTVNMNRNLTEDDSGWYWCVELGGMWVSDSTASLYISVVQGMVVMNGMVSAEKGKSVSVQCLYSKNLRSSEKRWCRSGNWNNSC  
LLTDSEGTFSGKNVHIHDDKNSVFTVTLQRLERDSDGWYWCAGQQNVAHVSVTRRSPTPVSTASPVHNKTAGNLSVTSNESYSR  
P|VWESPLVMCGVLLVMTACVALW|KLQQQCKKKHKPRETSDMSDNLAICPWREGDCKNASVIFLNTPAQQVQML

>Pigr12.1 encoded by cDNA 3842, transcript variant 1 (GenBank KF932326)  
MFYITAGFWLILGVES|FEGGSNHTITVKPGGSV IIPCYYDEKNPPQKKYWFSEHDQSNKYTNTTEENLSVIDHPDQSLFTVMTMRNLQ  
ENKHNGQYYCTVETEQKTNVTYELYLQVHSAPDVSVMNSSVSGHEGDDVSVQCFYSSGYKDKQKRWCRYKDQKCFSEEKTDTSQNSS  
VQISDDGESSFTVLMTGLTSLSDSGWYFCSVGHQTIPVQLTVTEDGVSAFHTSTVFCTST-

>Pigr12.1 encoded by cDNA 3843, transcript variant 2 (GenBank KF932327)  
MFYITAGFWLILGVES|FEGGSNHTITVKPGGSV IIPCYYDEKSPQKKYWFSEHDQSNKYTNTTEENLSVIDHPDQSLFTVMTMRNLQ  
ENKHNGQYYCTVETGQKTNVTYELYLQVHSAPDVSVMNSSVSGHEGDDVSVQCFYSSGYKDKQKRWCRYKDQKCLSEEKTDTSQNSS  
VQISDDGESSFTVLMTGLTSLSDSGWYFCSVGHQTIPVQLTVTEDGVSAFHTSTVFCTST-

>Pigr12.1 encoded by cDNA 3844, transcript variant 3 (GenBank KF932328)  
MFYITAGFWLILGVES|FEGGSNHTITVKPGGSV IIPCYYDEKSPQKKYWFSEHDQSNKYTNTTEENLSVIDHPDQSLFTVMTMRNLQ  
ENKHNGQYYCTVETGQKTNITYELYLQVHSAPDVSVMNSSVSGHEGDDVSVQCFYSSGYKDKQKRWCRYKDQKCFSEEKTDTSQNSS  
VRISDDGESSFTVLMTGLTSLSDSGWYFCSVGHQTIPVQLTVTEDGVSAFHTSTVFCTST-

>Pigr12.3 encoded by cDNA 3820, transcript variant 1 (GenBank KF932329)  
MAAYAAAKILYLSVGFWLILGAES|YDAFSSNRLTVKPGGSV TIPCYYDEKNTQLKYWFSVNDECNTYTNTTEENLSVIDHPDQSLVT  
VTMRNLQEKHTGEYHCGVVPGGVIYKIYLVQVQDVPDVSVKSSSVSGHEGGNVSVQCFYSSGYRDKQKRWGRFRKDEKCFREKKTNTSK  
NSSVQISDDGESSFTVLMTGLTSLSDSGWYCSAGEQILPLQLTVTTSES SVSVNTDTGTGHPDRWRFLSHS-

>Pigr12.3 encoded by cDNA 3822, transcript variant 2 (GenBank KF932330)  
MAAYAAAKILYLSVGFWLILGAES|YDAFSSNRLTVKPGGSV TIPCYYDEKNTQLKYWFSVNDECNTYTNTTEENLSVIDHPDQSLVT  
VTIRNLQEKHTGEYHCGVVPGGVIYKIYLVQVQDVPDVCVKSSSVSGHEGGNVSVQCFYSSGYRDKQKRWCRFRKDEKCFREKKTNTSK  
NSSVQISDDGESSFTVLMTGLTSLSDSGWYCSAGEQILPVQLTVTTSES SVSVNTDPGTGHPDRWRFL-

>Pigr12.3 encoded by cDNA 3823, transcript variant 3 (GenBank KF932331)  
MAAYAAAKILYLSVGFWLILGAES|YDAFSSNRLTVKPGGSV TIPCYYDEKNTQLKYWFSVNDECNTYTNTTEENLSVIDHPDQSLVT  
VTMRNLQEKHTGEYHCGVVPGGVIYKIYLVQVQDVPDVSVKSSSVSGHEGGNVSVQCFYSSGYRDKQKRWCRFRNDEKCFREKKTNTSK  
NSSVQISDDGESSFTVLMTGLTSLSDSGWYCSAGEQILPLQLTVTTSES SVSVNTDTGTGHPDRWRFLSHS-

>Pigr12.3 encoded by cDNA 3824, transcript variant 4 (GenBank KF932332)  
MAAYAAAKILYLSVGFWLILGAES|CDAFSSNRLTVKPGGSV TIPCYYDEKNTQLKYWFSVNDECNTYTNTTEENLSVIDHPDQSLVT  
VTMRNLQEKHTGEYHCGVVPGGVIYKIYLVQVQDVPDVSVKSSSVSGHEGGNVSVQCFYSSGYRDKQKRWCRFRKDEKCFREKKTNTSK  
NSSVQISDDGESSFTVLMTGLTSLSDSGRYCSAGEQILPLQLTVTTSES SVSVNTDTGTGHPDRWRFLSHS-

>Pigr12.3 encoded by cDNA 3968, transcript variant 5 (GenBank KF932333)  
MTAYAAARILYLSVGFWLILGAES|YDAFSSNRLTVKPGESV TIPCYYDEKNTQLKKYWFSVNDKNTYTNTTEENLSVIDHPDQSLV  
TVTMRNLQEKHTGEYHCGVVPGGVIYKIYLVQVQDVPDVSVKSSSVSGHEGGNASVQCFYSSGYRDTQKRWCRFRKDEKFFREKKTNTS  
KNSSVQISDDGESSFTVLMTGLRLSDSGWYFCSAGEQILPLQLTVTTLES SVSVNTDTGTGHPDRWRFLSHS

>Pigr12.3 encoded by cDNA 3969, transcript variant 6 (GenBank KF932334)  
MTAYAAARILYLSVGFWLILGAES|YDAFSSNRLTVKPGGSV TIPCYYDEKNTQLKKYWFSVNDKNTYTNTTEENLSVIDHPDQSLV  
TVTMRNLQEKHTGEYHCGVVPGGVIYKIYLVQVQDVPDVSVKSSSVSGHEGGNASVQCFYSSGYRDTQKRWCRFRKDEKFFREKKTNTS  
KNSSVQISDDGESSFTVLMTGLRLSDSGWYFCSAGEQILPLQLTVTTLES SVSVNTDTGTGHPDRWRFLSHS

>Pigr12.4 encoded by cDNA 4003, transcript variant 1 (GenBank KF932335)  
MAAYATATILYISIGFWFILSADS YNEFSNHALTVPPGGSVTIPCHYNEQYTQLKHKCYLETDKYNTREKNLLVIDHPDQSLFTVT  
MRNLRENQTGLYYCVVETGGTRTVIYEFYLVKQYVPDVSVMSSSVSGHEGDTVSVQCFYSSGYKNEQKQWCRYKNQKCFGEKKTDT  
KSSSVQISDDGKSSFTVLMTGLRLSDSGWYFCSVGNQMIPVQLTVTHTESDRNNKDRDEKLS PVWFFALTPVLLISLILVGVFIFK  
RRRPKQDEHQLKERNDSTTDEISSKPDDLAVYCSIINDETPYISISPLDPNKNMIYSTIDYIPGSEAKPPAGEDVYSSVGP

>Pigr12.4 encoded by cDNA 4004, transcript variant 2 (GenBank KF932336)  
MAAYATATILYISIGFWFILSADS YNEFSNHALTVPPGGSVTIPCHYNEQYTQLKHKCYLETDKYNTREKNLLVIDHPDQSLFTVT  
MRNLRENQTGLYYCVVETGGTRTVIYEFYLVKQYVPDVSVMSSSVSGHEGDTVSVQCFYSSGYKNEQKQWCRYKNQKCFGEKKTDT  
KSSSVQISDDGKSSFTVLMTGLRLSDSGRYFCSVGNQMIPVQLTVTHTESDRNNKDRDEKLS PVWFFALTPVLLISLILVGVFIFK  
RRRPKQDEHQLKERNDSTTDEISSKPDDLAVYCSIINDETPYISISPLDPNKNMIYSTIDYIPGSEAKPPAGEDVYSSVGP

>Pigr12.5 encoded by cDNA 3970 (GenBank KF932337)  
MTAYATTKINYILVGFWLILGAES YFDWLSRITIKPGGSVTIPCLYEKNPMQLKYWYSVNNPSNKFNTNKEENLSVIDHPDQSLFT  
VTMRNLQENQTGEYHCVVKTGVTGGVTYRVYLDIRYDPDVS LKGRSLSGHEGGNVSVQCFYSSAYRNSQKQWCRYKDEKCFTERKTD  
ISQNSSVQISDDGESPFVLMTGLTLSDSGWYFCSAGEQIIPVQLTITHTESVNINTDLNNDGAEELP PVWFLASALVLLISLILV  
GVFIWRRRPRKQDEHQLKESNNSRTTDEISSKPDDLAVYCSIINDETPYISISPLDPNKNMIYSTIDYIPGSEAKSPAGEDAYCTVGP

>Pigr13.4 encoded by cDNA 3962, transcript variant 1 (GenBank KF932338)  
MIHTLILTGVLHIGDGA WIDKLNIGVKS GSPGIIPCQYVEQYQENLKYWCQGMFWISCTILAFNGPRSKFSITDYPAQSIFTVEW  
QNLQPSDSGYWCAVEIGDSEKPDASYLYLVKQVQSDVSVKSSSVSGHEGGNVSVQCFYSSGYKAKEKQWCKYKQKCFYPKKN  
TSQNSSVQISDDGKSSFTVRLMAGLRLSDSGWYFCSVGNLQVPVQLTVSKPDPKDLTYTQPSAKQIPTSVLTTVSRPGTNILNKEHFC  
LSET

>Pigr13.4 encoded by cDNA 4001, transcript variant 2 (GenBank KF932339)  
MIHTLILTGVLHIGDGA WIDKLNIGVKS GSPGIIPCQYVEQYQENLKYWCQGMFWISCTILAFNGPRSKFSITDYPAQSIFTVEW  
QNLQPSDSGYWCAVEIGDSEKPDASYLYLVKQVQSDVSVKSSSVSGHEGGNVSVQCFYSSGYKAKEKQWCKYKQKCFYPKKN  
TSQNSSVQISDNGESSFIVLMTGLNLSDFGWYFCSVGNLQVPVQLTVSKPDPKDLTYTQPSAKQIPTSVLTTVSRPGTNILNKEHFC  
LSET

>Pigr3.5 encoded by cDNA 3960, transcript variant 1 (GenBank KF932340)  
MIHTLILAGVLLHIGNGA WIDKLNIGVKS GSPGIIPCCLYKEQYKENHKEYWCQGMFWSSCTILAFNGPRSKFSITYYPAQSIFTVKW  
QNLQPSDSGYWCAVEIGD SGIPDARYLYLVKQVQVPDVSVKSSSVSGHEGGNVSVQCFYSSEYHNKLGWCRVKDKRCFKEEKTDT  
SQNPSVQISDDGESSFTVLM AELRLSDSGWYFCSVGD LQVPVRLTVTKPEPKAAMTTGSRPKSRVEDPPTTDSEINLGKDSKDEQNK  
YD MILIMCLVVT LALLLLVALFTII IRRMRKNPEGDP IREERFNSSTMTMPSENQMTSISP AEADSSADDSS MVYSPV SFTKTCLS  
SVDPEPDVLYSAVMKDRKTV

>Pigr3.5 encoded by cDNA 3961, transcript variant 2 (GenBank KF932341)  
MIHTLILAGVLLHIGNGA WIDKLNIGVKS GSPGIIPCCLYKEQYKENHEYWCQGMFWSSCTILAFNGPRSKFSITYYPAQSIFTVKW  
QNLQPSDSGYWCAVEIGD SGIPDARYLYLVKQVQVPDVSVKSSSVSGHEGGNVSVQCFYSSEYHNKLGWCRVKDKRCFKEEKTDT  
SQNPSVQISDDGESSFTVLM AELRLSDSGWYFCSVGD LQVPVRLTVTKPEPKAAMTTGSRPKSRVEDPPTTDSEINLGKDSKDEQNK  
YD MILIMCLVVT LALLLLVALFTII IRRMRKNPEGDP IREERFNSSTMTMPSENQMTSISP AEADSSADDSS MVYSPV SFTKTCLS  
SVDPEPDVLYSAVMKDRKTV

>Pigr3.5 encoded by cDNA 4021, transcript variant 3 (GenBank KF932342)  
MIHTLILTGVLHIGDGA WIDKLNIGVKS GSPGIIPCCLYKEQYKENHKEYWCQGMFWSSCTILAFNGPRSKFSITYYPAQSIFTVKW  
QNLQPSDSGYWCAVEIGD SGIPDARYLYLVKQVQVPDVSVKSSSVSGHEGGNVSVQCFYSSEYHNKLGWCRVKDKRCFKEEKTDT  
SQNPSVQISDDGESSFTVLM AELRFSDSGWYFCSVGD LQVPVRLTVTKPEPKAAMTTGSRPKSRVEDPPTTDSEINMGKDSKDEQNK  
YD MILIMCLVVT LALLLLVALFTII IRRMRKNPEGDP IREERFNSSTMTMPSENQMTSISP AEADSSADDSS MVYSLV PFTKTCLS  
SVDPEPDVLYSAVMKDRKTV

>Pigr13.8 encoded by cDNA 4020, transcript variant 1 (GenBank KF932343)  
MIHTLILAGVLLHIGDGA WVINPNIRVKSGSPGIIPCCLYKEQHKEHQKYL CRGRFWSSCTILAYVNETGKFFITDYPAQSIFTVKW  
QNLQESDYGYWCAVEIGGPGTLDSDSYFYLMVQSASALSVLSSSVSGHEGGNVSVQCFYSSGYKAYNKQWCRVKDKSCFTEKKTDT  
SQNSSVQISDDGKSSFTVLMTGLTLSDSGWYFCSVEYLQDPVQLSVTKPEPKVFPVLTPTCTPEEKNEHNTTFQOYNFNKYASNDK  
QR

>Pigr13.8 encoded by cDNA 4023, transcript variant 2 (GenBank KF932344)  
 MIHTLILAGVLLHIGDGAWVINPNIRVKS GSPGIIPCLYKEQHKEHQKYL CRVRFWSSCTILAYVNETGKKFFITDYPAQSIFTVKW  
 QNLQESDYGCYWCAVEIGGPGTLDSDSYFYLMVQSASALSVLSSSVSGHEGGNVSVQCFYSSGYKAYNKQWCRVKDKSCFTEKKTDT  
 SQNSSVQISDDGKSSFTVLMTGLTSLSDSGWYFCSVEYLDQVPVQLTVTKPEPKVFPVLTPTCTPEEKNEHNTTLQQYNFNKHASNDK  
 QR

>Pigr13.9 encoded by cDNA 4027 (GenBank KF932345)  
 MIHTLILAGVLLHIGDGWVWINKLYIGVKS GSPGIIPCLYEEQYKEHQKYWCRGYIWSSCSILAYVNETRNKFSITDYPAQSIFTVEW  
 QNLQESNSSYYWCAVEIGGPGTLDAGYYLYLTVQSDPAVSVMNSSVSGHEGGNVSVQCFYSSRYKAKNKQWCRVKDKSCFTEKKTDT  
 SQNSSVQISDDDESSFTVLITGLTSLSDSGWYFCSVEDLQVPVQLTVTKPEPKEMNTTQLSTNTTSAKMHSTINTLCLLIQG

>Pigr13.10 encoded by cDNA 4002, transcript variant 1 (GenBank KF932346)  
 MIHTLILTG VLLHIGDGAWIDKLNIGVKS GSPGIIPCQYVEQYQENLKYWCQGMFWISCTILAFNGPRSKFSITDYPAQSIFTVEW  
 QNLQPSDSGYWCAVEIGDSEKPDASYLYLKVQSAPDVSVKSSSVSGHEGGNVSVQCFYSSGYKAKEKQWCKYKDQKCFYPPKNTG  
 TSQNSSVQISDDGKSSFTVRLMAGLRLSDSGWYFCSVGDQVPVRLTVTKPEPKAPDLSVMNSSVSGHVGGNVSVQCFYSSGYKNKTK  
 QWCRVKDKSCFPENKTDTSQNSSVQISDNGESSFIVLMTGLNLSDSGWYFCSVGNLQVPVQLTVSKPDPKDLYTTQPSAKQIPTSVL  
 TTVSRPGTNILNKEHFCLSET

>Pigr13.10 encoded by cDNA 5187, transcript variant 2 (GenBank KF932347)  
 MIHTLILTG VLLHIGDGAWIDKLNIGVKS GSPGIIPCQYVEQYQENLKYWCQGMFWSSCTILAFNGPRSKFSITDYPAQSIFTVEW  
 QNLQPSDSGYWCAVEIGDSEKPDASYLYLKVQSAPDVSVKSSSVSGHEGGNVSVQCFYSSGYKAKNKQWCGYKDKKCFYPPKNTG  
 TSQNSSVQISDDGKSSFTVRLMAGLRLSDSGWYFCSVGDQVPVRLTVTKPEPKDPDLSVMNSSVSGHVGGNVSVQCFYSSGYKNKTK  
 QWCRVKDKSCFPENKTDTSQNSSVQISDDGESSFIVLMTGLNLSDSGWYFCSVGNLQVPVQLTVSKPDPKDLYTTQPSAKQIPTTVL  
 TTVSRPGTNILNKEHFCLSET

>Pigr13.10 encoded by cDNA 5188, transcript variant 3 (GenBank KF932348)  
 MIHTLILTG VLLHIGDGAWIDKLNIGVKS GSPGIIPCQYVEQYQENLKYWCQGMFWSSCTILAFNGPRSKFSITDYPAQSIFTVEW  
 QNLQPSDSGYWCAVEIGDSEKPDASYLYLKVQSAPDVSVKSSSVSGHEGGNVSVQCFYSSGYKAKNKQWCGYKDKKCFYPPKNTG  
 TSQNSSVQISDDGKSSFTVRLMAGLRLSDSGWYFCSVGDQVPVRLTVTKPEPKDPDLSVMNSSVSGHVGGNVSVQCFYSSGYKNKTK  
 QWCRVKDESCFPENKTDTSQNSSVQISDDGESSFIVLMTGLSLSDSGWYFCSVGNLQVPVQLTVSKPDPKDLYTTQPSAKQIPTTVL  
 TTVSRPGTNILNKEHFCLSET

>Pigr14.2 encoded by cDNA 4177 (GenBank KF932349)  
 MAHPSLLIAVLFCTAGTLSMKTLDRVPVIEGETITIPCLYDNKYKLNKKYWCNGNTWLGCSSVAYANHTGKWTITDYDPDHNMFTVTL  
 NNSTSSDSGHYWCAVEIDHHVDNSKYLYLTVQKAPDVSVLSSSVSGHKGDDVSVRCFYRSAYQNKLKQWCRIDDLTCFREKKTDTSQ  
 NSSVQISDDGESSFTVLMTGLRLSDSGWYFCSVGNLQVPVQLTVYQGENKNKNTCKSFIQLPSDKI

**Figure S5. Full-length zebrafish plgR and PIGRL proteins.** Predicted proteins encoded by zebrafish *pigr* and PIGRL transcripts are shown. Transcript numbers corresponding to Figure 5 are listed and GenBank accession numbers are in parentheses. Predicted peptide leader sequences and transmembrane domains were predicted by SMART software (Letunic et al. 2012. *Nucleic Acids Res.* **40** (D1): D302-D305) and are in boxed text. Cytoplasmic ITIMs (S/I/V/LxYxxI/V/L) are shaded orange, ITIM-like sequences are shaded yellow and additional cytoplasmic tyrosines are shaded green.



**plgR<sup>4121</sup>-D1 and plgR<sup>scaffold234</sup>-D1**

pIgr<sup>4121</sup> GSHSTVTTIGDVAVLEGGSVTPCHYNPQYISNVKYWCSGRMREFCSSLARTDDPESAPNGNRKVTIADDPTQHVFVTVMNRNLTEDDSGWYWCGVELGGMWVSDSTASLYISVVQ  
pIgr<sup>scaf234</sup> GSHSTVTTIGDVAVLEGGSVTPCHYNPQYISNVKYWCSGRMREFCSSLARTDDPESAPNGNRKVTIADDPTQHVFVTVMNRNLTEDDSGWYWCGVELGGMWVSDSTASLYISVVQ

**Pigr1.1<sup>231</sup>-D1 (GenBank KF932318) and Pigr1.1<sup>scaffold234</sup>-D1**

1. 1<sup>231</sup> PEYKTASASRALTVQTTGGSLVIPCYYDRYYTEYKKYWCFFNAKGYFSSCSILAYANETKGVSVTDHPDQSFFTVTMRNLQHEDTGAYWCAVEIKBFNLDKREQLHLTVQS  
1. 1<sup>scaf234</sup> PEYKTASASRALTVQTTGGSLVIPCYYDRYYTEYKKYWCFFNAKGYFSSCSILAYANETKGVSVTDHPDQSFFTVTMRNLQHEDTGAYWCAVEIKBFNLDKREQLHLTVQS

**Pigr1.7<sup>251</sup>-D1 (Genbank KF932319) and Pigr1.7<sup>scaffold234</sup>-D1**

1. 7<sup>251</sup> CKTAYVDPVLTVQTTGGSVVIPCIFYDKRYAEYKYYWCFIKTDSYWFCSALAYTNETKGVSVVIDHPDQSFFTVTMRNLQHEDTGYYWCAVEIGTILIRDETCKLQLRVQT  
1. 7<sup>scaf234</sup> CKTAYVDPVLTVQTTGGSVVIPCIFYDKRYAEYKYYWCFIKTDSYWFCSALAYTNETKGVSVVIDHPDQSFFTVTMRNLQHEDTGYYWCAVEIGTILIRDETCKLQLRVQT

**Pigr2.6<sup>1926</sup>-D1 (Genbank KF932320) and Pigr2.6<sup>scaffold235</sup>-D1**

2. 6<sup>1926</sup> VESFSGGSNRTITVKPGGSVTIPCYYDEKNPPRRKYWFSEHGQSNKYTNTTEENLSVIDHPDQSLFTVMTMRNLQENKHNGQYYCTVETGQKPNVTYVTVELYLKVHS  
2. 6<sup>scaf235</sup> VESFSGGSNRTITVKPGGSVTIPCYYDEKNPPRRKYWFSEHGQSNKYTNTTEENLSVIDHPDQSLFTVMTMRNLQENKHNGQYYCTVETGQKPNVTYVTVELYLKVHS

**Pigr3.2<sup>1933</sup>-D1 (GenBank KF932321) and Pigr3.2<sup>scaffold235</sup>-D1**

3. 2<sup>1933</sup> EAWVYDVNIGVKSGSPGIIPCVYKEIKLANKRYWCQGSVWSSCTILAYANETRNFKSITDYPEQSVFTVEWQNLQPSDSGCYWCAVEINNYGTVDDGYHMYLTVQS  
3. 2<sup>scaf235</sup> EAWVYDVNIGVKSGSPGIIPCVYKEIKLANKRYWCQGSVWSSCTILAYANETRNFKSITDYPEQSVFTVEWQNLQPSDSGCYWCAVEINNYGTVDDGYHMYLTVQS

**Pigr3.2<sup>1934</sup>-D2 (GenBank KF932322) and Pigr3.2<sup>scaffold235</sup>-D2**

3. 2<sup>1934</sup> YGVFVKSSSVSGHEGGDVSVCQCIYSDIYRNTIKQWCRVKDKRCYAVERSDTSQNPVQISDDGESSFTVLMTGLRLSDSGWYFCSVEDLQVLVQLTVTKPGPK  
3. 2<sup>scaf235</sup> YGVFVKSSSVSGHEGGDVSVCQCIYSDIYRNTIKQWCRVKDKRCYAVERSDTSQNPVQISDDGESSFTVLMTGLRLSDSGWYFCSVEDLQVLVQLTVTKPGPK

**Pigr4.1<sup>1910</sup>-D2 (GenBank KF932323) and Pigr4.1<sup>scaffold235</sup>-D2**

4. 1<sup>1910</sup> FVVSVMNSVLFEGHEGDDVRVQCFYSAYQNELKQWCRMKDQKCFTEBKIDTSQSSVQISDDGESLTVLMTGLRLSDSGWYFCSAGDLQVPVQLTVT  
4. 1<sup>scaf235</sup> FVVSVMNSVLFEGHEGDDVRVQCFYSAYQNELKQWCRMKDQKCFTEBKIDTSQSSVQISDDGESLTVLMTGLRLSDSGWYFCSAGDLQVPVQLTVT

**Figure S6. plgR and Pigr domains employed as Fc fusions.** Alignments of Ig domains from plgR-hFc and PIGRL-hFc fusion proteins with Ig domains encoded by corresponding genomic sequences. Allele designation is shown as superscript after the gene.
